# Supplementary material for: Defects and asymmetries in the visual pathway of non-human primates with natural strabismus and amblyopia
Source: PubMed Central journal article supplement — Zool Res. 2023 Jan 18;44(1):153–68. doi: 10.24272/j.issn.2095-8137.2022.254 (PMC9841183; doi:10.24272/j.issn.2095-8137.2022.254), 2023-01-18
Supplement: zr-44-1-153-S1.pdf [file zr-44-1-153-S1.pdf]

## Supplementary Materials

### **Defects and asymmetries in the visual pathway of non-human primates with natural strabismus and amblyopia**

Feng Liu<sup>1,#</sup>, Zhong-Hao Wang<sup>1,#</sup>, Wan-Jing Huang<sup>1,#</sup>, Ying Xu<sup>2</sup>, Xuan Sang<sup>1</sup>, Rui-Feng Liu<sup>1</sup>, Zhou-Yue Li<sup>1</sup>, Ya-Lan Bi<sup>3</sup>, Lei Tang<sup>1</sup>, Jing-Yi Peng<sup>1</sup>, Jia-Ru Wei<sup>1</sup>, Zhi-Chao Miao<sup>3,4</sup>, Jian-Hua Yan<sup>1,\*</sup>, Sheng Liu<sup>1,5,\*</sup>

<sup>1</sup> State Key Laboratory of Ophthalmology, Zhongshan Ophthalmic Center, Sun Yat-sen University, Guangdong Provincial Key Laboratory of Ophthalmology and Visual Science, Guangzhou, Guangdong 510060, China

<sup>2</sup> Guangdong-Hongkong-Macau Institute of CNS Regeneration, Jinan University, Guangzhou, Guangdong 510632, China

<sup>3</sup> European Molecular Biology Laboratory, European Bioinformatics Institute (EMBL-EBI), Wellcome Genome Campus, Cambridge CB10 1SD, UK

<sup>4</sup> Translational Research Institute of Brain and Brain-Like Intelligence and Department of Anesthesiology, Shanghai Fourth People's Hospital Affiliated to Tongji University School of Medicine, Shanghai 200081, China

<sup>5</sup> Guangdong Province Key Laboratory of Brain Function and Disease, Guangzhou, Guangdong 510080, China

#Authors contributed equally to this work

\*Corresponding authors, E-mail: yanjh2011@126.com; liush87@mail.sysu.edu.cn

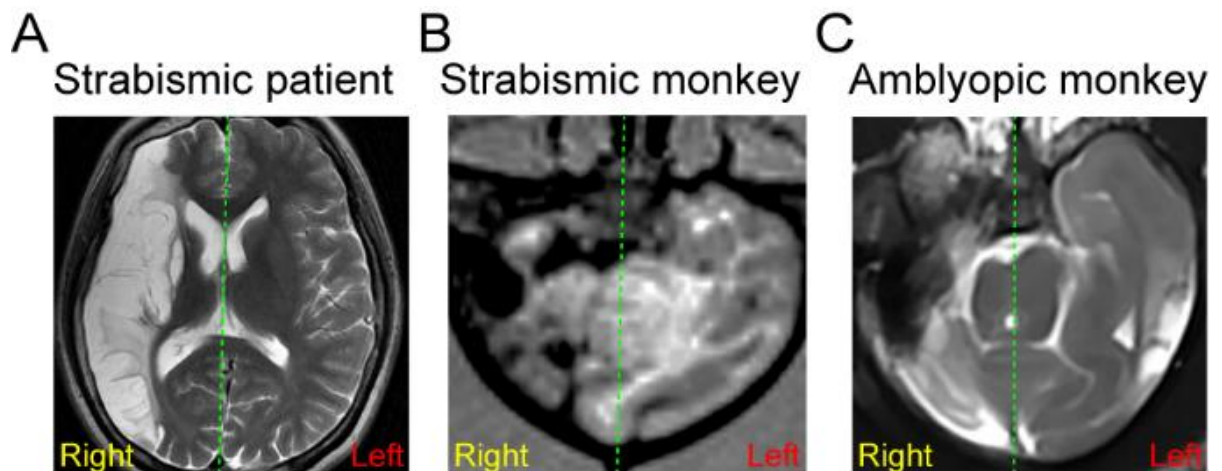

**Supplementary Figure S1 Magnified horizontal plane view of whole brain volumes among strabismic patient and natural strabismic and amblyopic monkeys**

A-C: Details of abnormal asymmetrical brain impairment in strabismic patient (A) and natural strabismic (B) and amblyopic (C) monkeys were shown by magnified horizontal plane view of whole brain volumes. Red left and yellow right represent left and right hemisphere, respectively. Green dotted line indicates central line of whole brain.

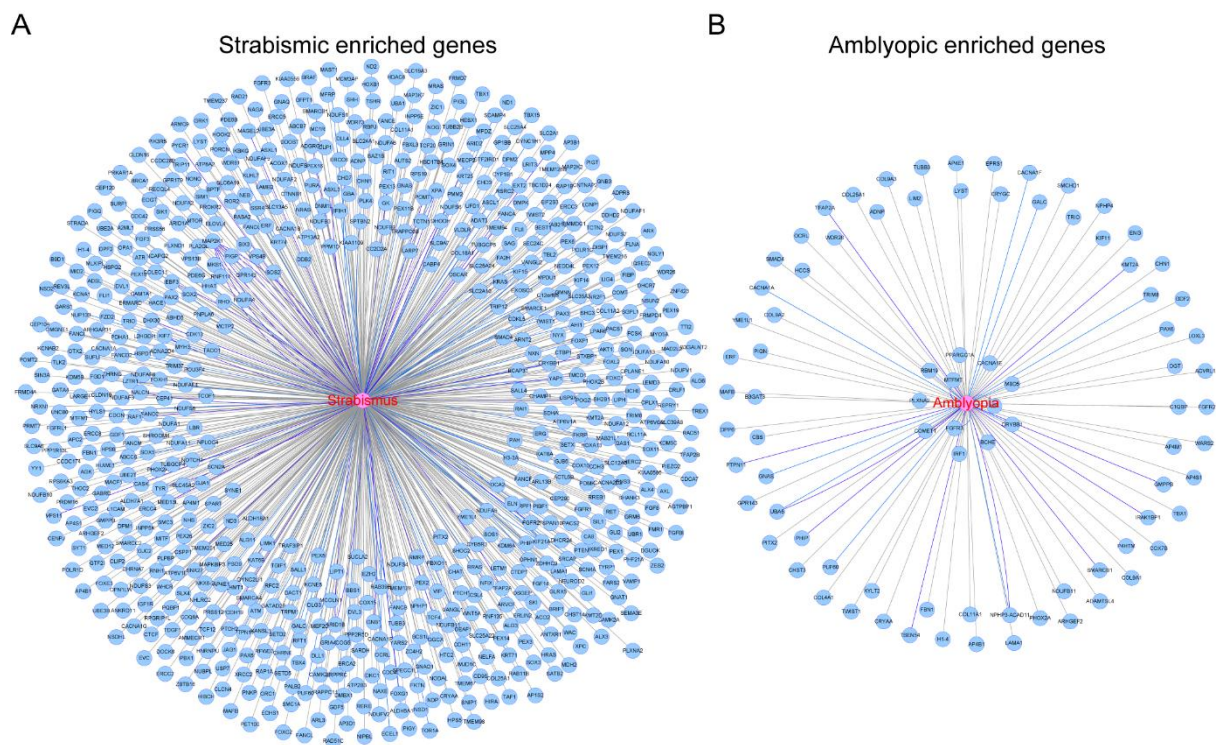

**Supplementary Figure S2 Disease-based network analysis of genes involved in**

## strabismus and amblyopia

A-B: Visualizations for candidate enriched genes associated with strabismus (A) and amblyopia (B). Central nodes with pink background represent disease name, and surrounding nodes with blue background represent disease-associated genes.

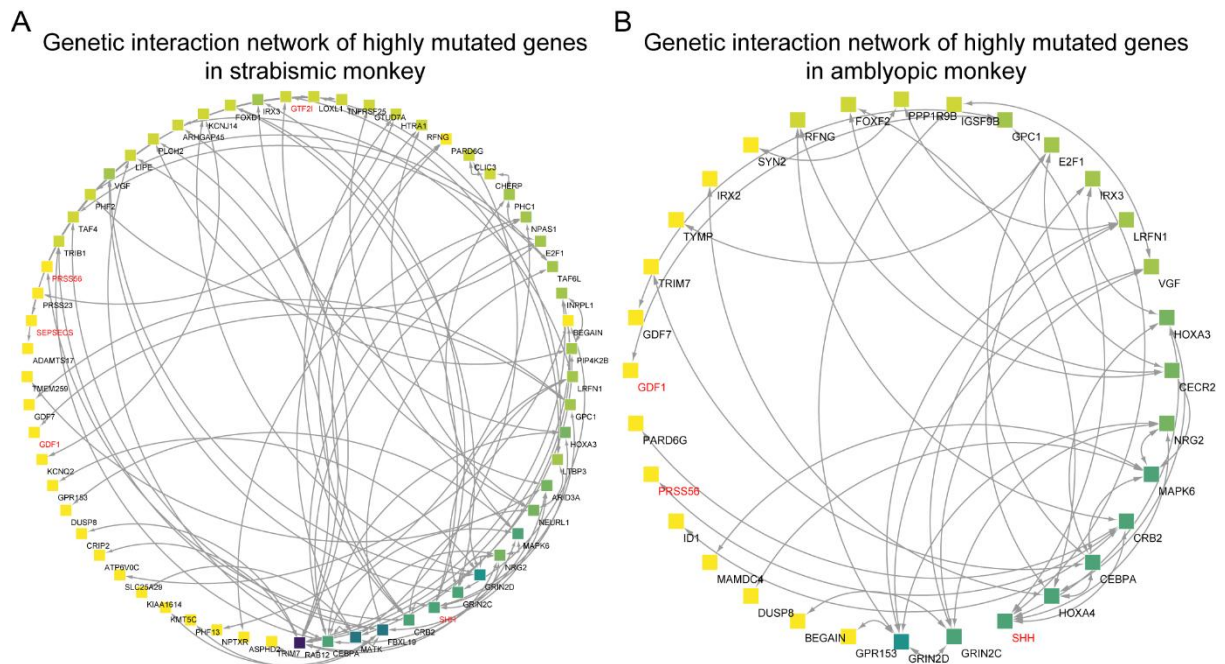

### Supplementary Figure S3 Differences in genetic interaction networks of top candidate genes between natural strabismic and amblyopic monkeys

A-B: Genetic interaction network analysis of candidate genes with higher degree of genetic variation revealed regulatory differences between strabismic (A) and amblyopic (B) monkeys. Only candidate genes with a score above 3 were considered. Black and red gene names represent candidate and strabismus-associated genes, respectively. Darker node backgrounds indicate stronger interactions.
